# Supplementary material for: Game—The Freight Transportation Game: Operational Challenges for Carriers in Online Spot Market Platforms
Source: Atypon-hosted journal article supplement (doi:10.1287/ited.2024.0091), 2025-02-17

## Freight Transportation Game: How to access to the game

During the class session, students will form groups of four players. Each group will have one designated master player responsible for creating and managing the game session. Here's how to access the game:

### For the Master Player:

1. Access the game link: <https://freight-transport.poneyhost.eu/login>

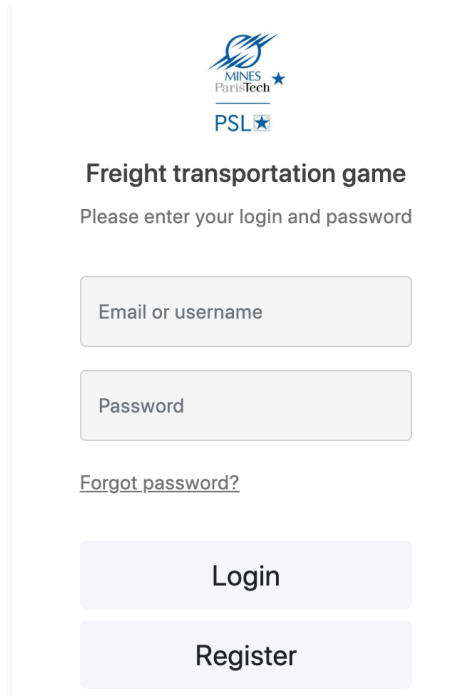

The screenshot shows the login page for the Freight transportation game. At the top, there are logos for MINES ParisTech and PSL. Below the logos, the text reads "Freight transportation game" and "Please enter your login and password". There are two input fields: "Email or username" and "Password". Below the password field is a link for "Forgot password?". At the bottom, there are two buttons: "Login" and "Register".

2. Click on "Register" to create a new game session for your group

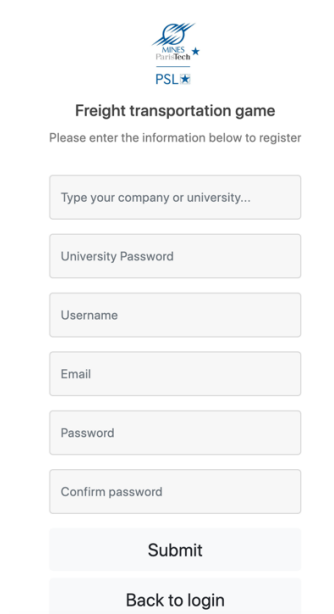

The screenshot shows the registration page for the Freight transportation game. At the top, there are logos for MINES ParisTech and PSL. Below the logos, the text reads "Freight transportation game" and "Please enter the information below to register". There are six input fields: "Type your company or university...", "University Password", "Username", "Email", "Password", and "Confirm password". At the bottom, there are two buttons: "Submit" and "Back to login".

3. Enter your university name and the provided password given by the teacher to access the game. the “University name” and “University password” are the university's credentials provided by the game developers, not the students' personal university accounts
4. Then, choose a username, provide your email, and set a password for your account, and click on submit

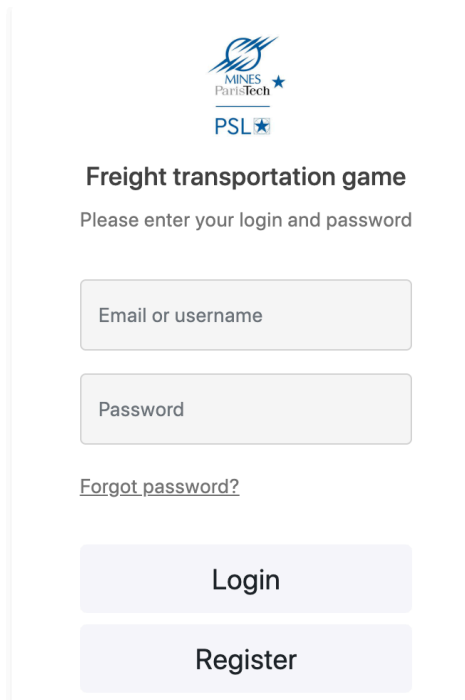

The image shows a login and registration page for the 'Freight transportation game'. At the top, there are logos for MINES ParisTech and PSL. The title is 'Freight transportation game' followed by the instruction 'Please enter your login and password'. There are two input fields: 'Email or username' and 'Password'. Below these is a link for 'Forgot password?'. At the bottom, there are two buttons: 'Login' and 'Register'.

5. After creating your account, return to the login page and enter your newly created username and password

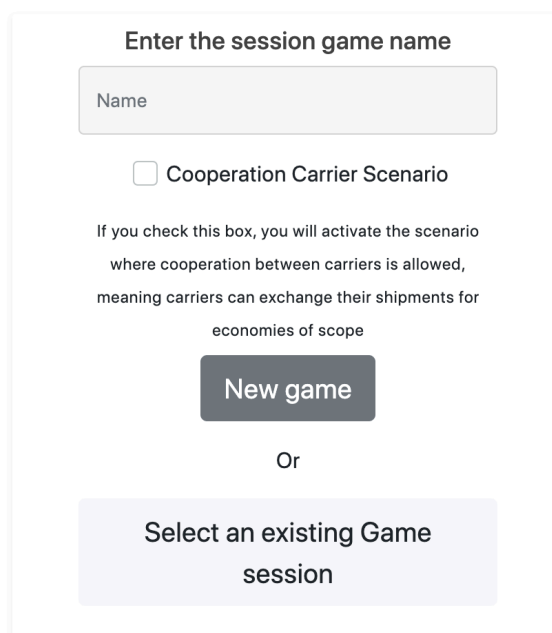

The image shows a page titled 'Enter the session game name'. It features a text input field labeled 'Name'. Below the input field is a checkbox labeled 'Cooperation Carrier Scenario'. A note below the checkbox states: 'If you check this box, you will activate the scenario where cooperation between carriers is allowed, meaning carriers can exchange their shipments for economies of scope'. There are two buttons: a dark grey 'New game' button and a light grey 'Select an existing Game session' button, with the word 'Or' centered between them.

6. Create a session for your group by selecting a session name and deciding whether to activate the cooperation carrier scenario, based on the instructions provided by your lecturer. Confirm the scenario choice with your teacher and click the "New Game" button

**Invite new players**

Email

Send invitation

**Invited players :**

Play

7. Invite the other three members of your group by entering their email addresses and sending them invitations
8. Once all members are invited, ensure all members receive invitations before clicking "Play" to start the game
9. Familiarize yourself with the game interface and tutorial before beginning

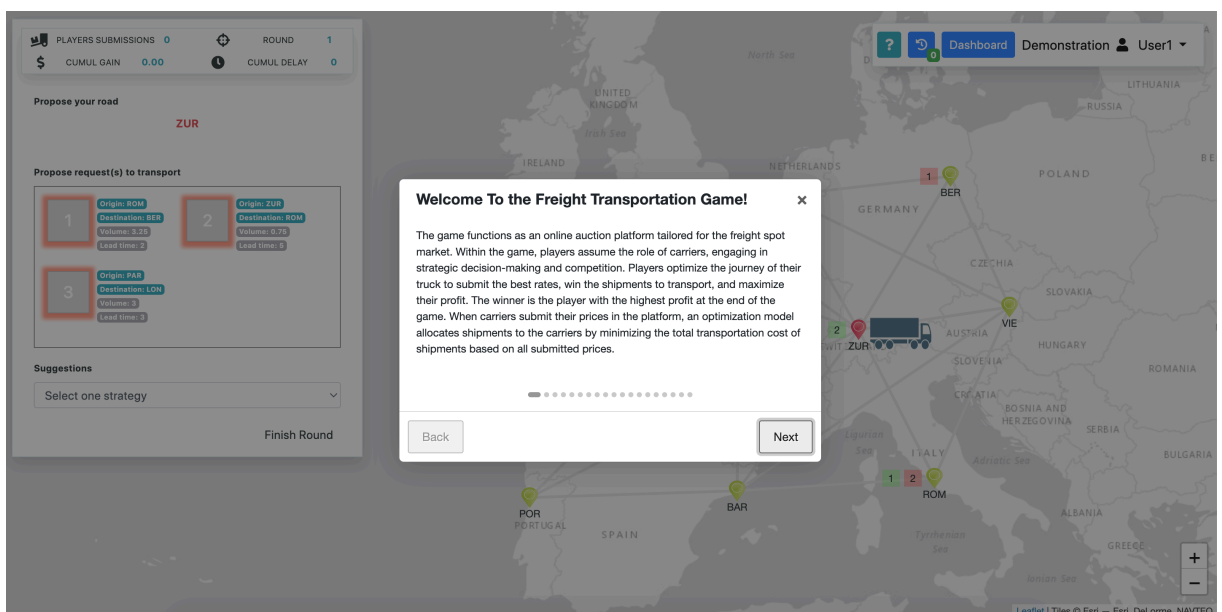

### For Other Players:

1. If you are invited by the master player, you will receive an email at the address you provided to him

2. Click on the link in the email to access the registration page, which includes the name of the game session you belong to

MINES ParisTech  
PSL

**Hello! You were invited to join the room **Demonstration****

Please enter the information below to start playing

Username

mariam.lafkihi@minesparis.psl.eu

Password

Confirm password

Submit

Back to login

3. Create your account by choosing a username and password
4. After creating your account, you will be directed to the game interface and tutorial. Be sure to read the tutorial carefully before starting to play

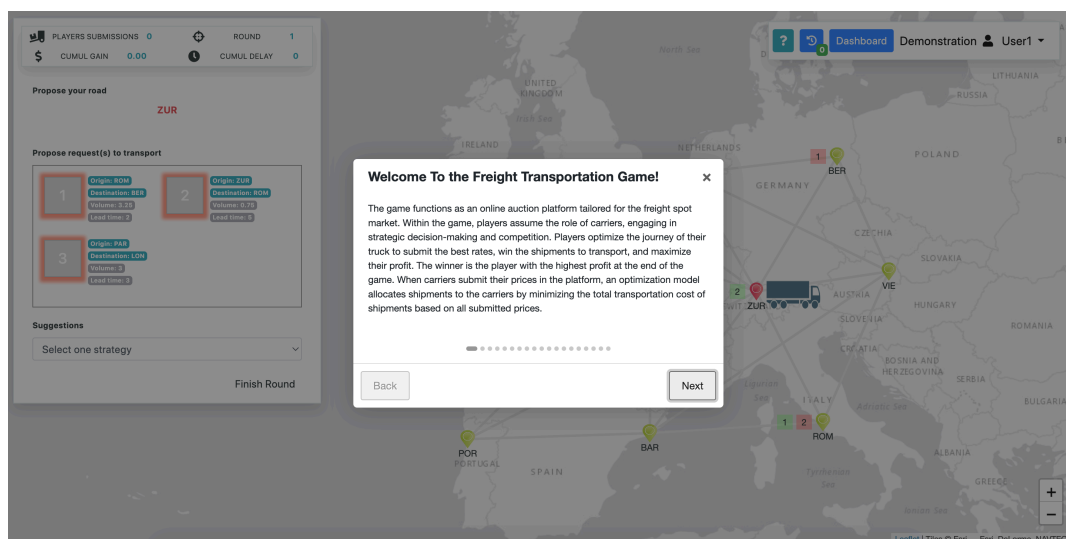

Supplement: ited.2024.0091.sm1.pdf [file ited.2024.0091.sm1.pdf]
